# Supplementary material
Source: publisher figshare collection journal article supplement (https://frontiersin.figshare.com/ndownloader/files/17579906)
Supplement: Supplementary file [file 17579906]

## *Supplementary Material*

### Supplementary Figures

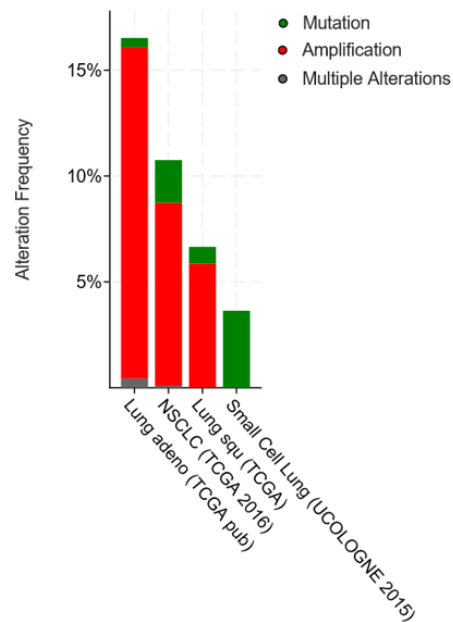

**Supplementary Figure S1. TCGA DNA sequencing of OTUD7B gene in lung cancer.** TCGA DNA sequencing results showing that OTUD7B gene is amplified at high frequencies in NSCLC, including LUAD and LUSC.

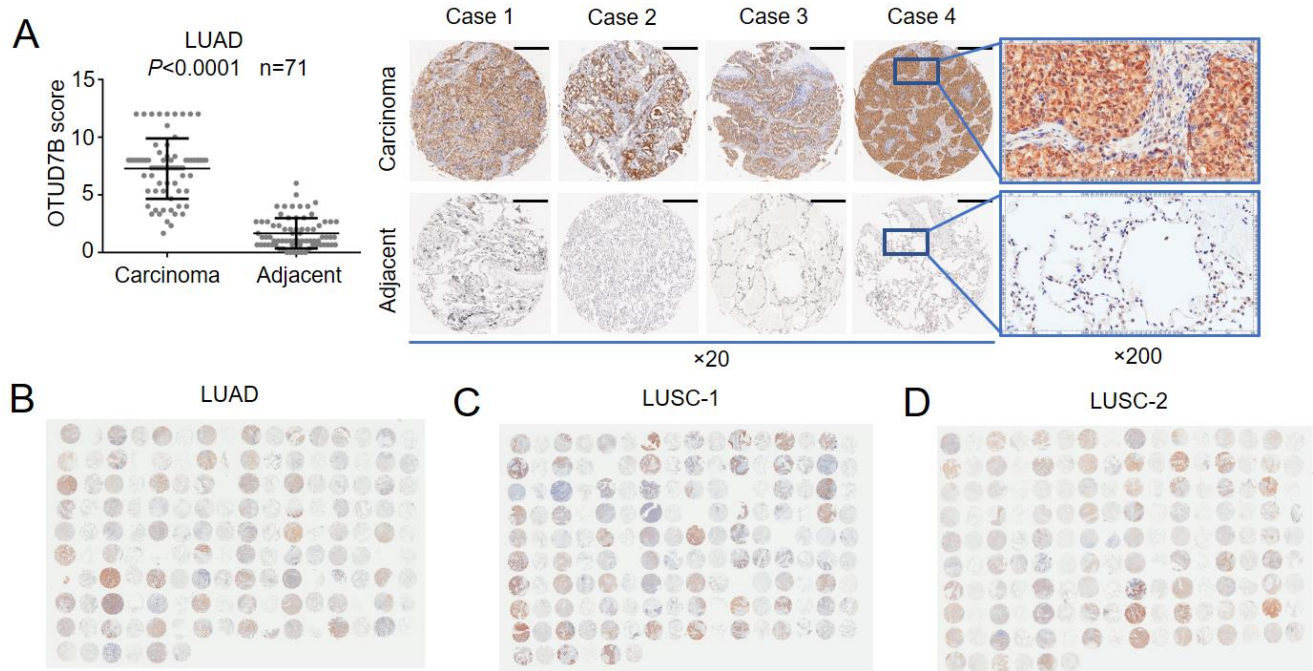

**Supplementary Figure S2. Elevated OTUD7B expression in LUAD is associated with cancer progression.** (A) OTUD7B expression scores in lung adenocarcinoma are shown. Lung adenocarcinoma tissues were compared with matched adjacent normal tissues using paired  $t$  test. Representative images of IHC staining of OTUD7B expression from 4 cases are shown. Magnification,  $\times 20$  (left) and  $\times 200$  (right); Scale bars, 400  $\mu\text{m}$ . (B-D) The LUAD (B) and LUSC (C and D) microarray IHC staining with anti-OTUD7B antibody.

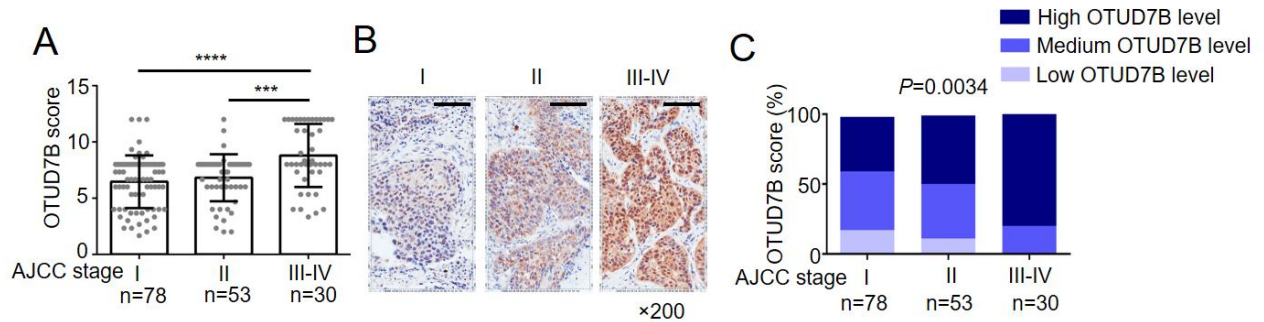

**Supplementary Figure S3. OTUD7B upregulation is associated with AJCC stage in NSCLC.**

(A) OTUD7B score in tumors with different AJCC stages (AJCC 7th Edition Clinical Staging). Data were analyzed using one-way ANOVA and Tukey's multiple comparisons test and are shown as mean  $\pm$  s.d. Each dot represents an individual sample. \*\*\*,  $P < 0.001$ , \*\*\*\*,  $P < 0.0001$ . (B) Representative images from IHC staining of OTUD7B in different AJCC stages are shown. Magnification,  $\times 200$ ; scale bars, 100  $\mu$ m. (C) The percentage of tumours with different AJCC stages. Data were analyzed using Pearson's  $\chi^2$  test.

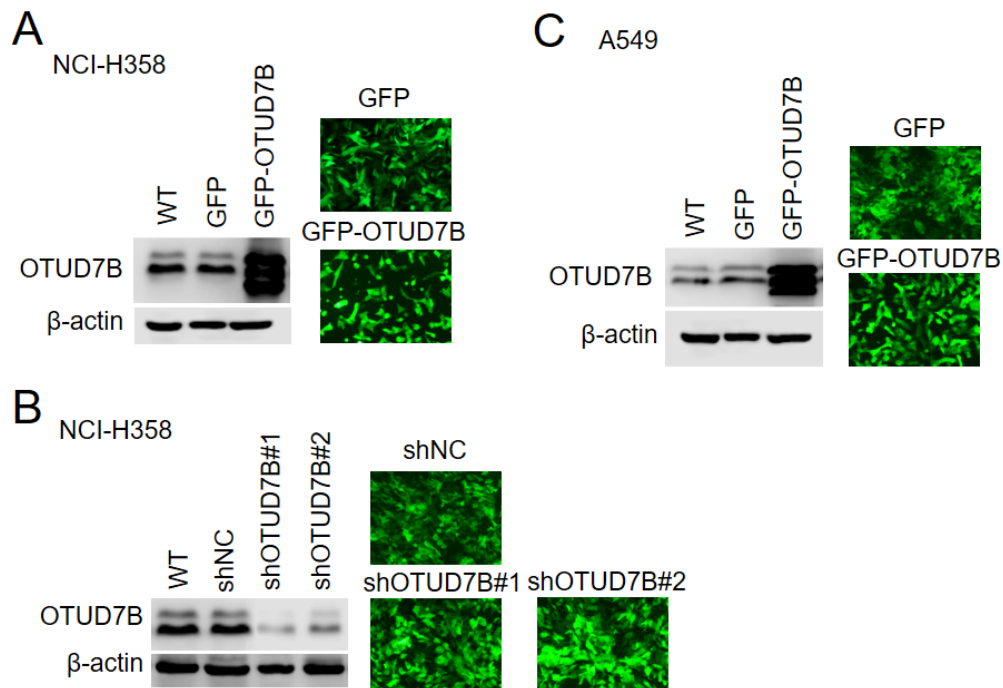

**Supplementary Figure S4. OTUD7B overexpression and knockdown in NSCLC cell lines.** (A) NCI-H358 cells were transduced with lentivirus expression vectors to get GFP or GFP-OTUD7B overexpression cells. Total cell lysates were subjected to immunoblotting using anti-OTUD7B antibody. GFP and GFP-OTUD7B expression efficiency were visualized using fluorescence microscope (*right panel*). WT, wild type. (B) NCI-H358 cells were transduced with a non-targeting control shRNA (shNC) or two different OTUD7B-specific shRNAs. Total cell lysates were subjected to immunoblotting using anti-OTUD7B antibody. Transduce efficiency were visualized using fluorescence microscope (*right panel*). (C) A549 cells were transduced with lentivirus expression vectors to get GFP or GFP-OTUD7B overexpression cells. Total cell lysates were subjected to immunoblotting using anti-OTUD7B antibody. GFP and GFP-OTUD7B expression efficiency were visualized using fluorescence microscope (*right panel*). WT, wild type.

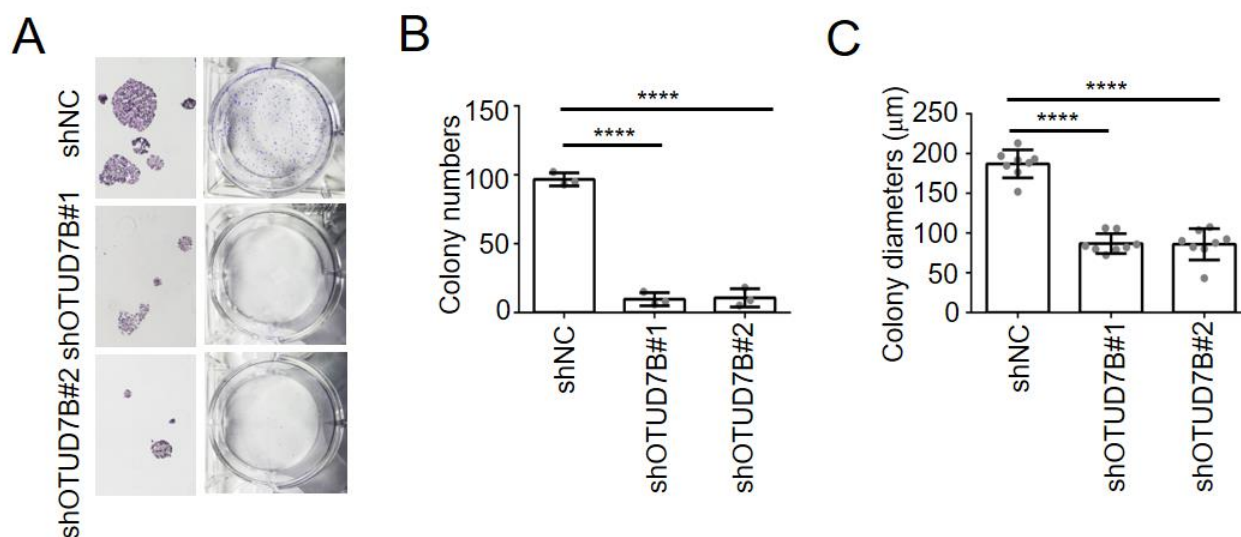

**Supplementary Figure S5. Knockdown of OTUD7B reduces proliferation in NCI-H358 cells.** NCI-H358 cells were transduced with shNC or shOTUD7B#1 or #2 and colony formation was preformed to determine cell proliferation. (A) Representative images. (B) Colony numbers in each group. (C) Colony diameters in each group. Data are shown as mean  $\pm$  s.d. \*\*\*\*,  $P < 0.0001$ .

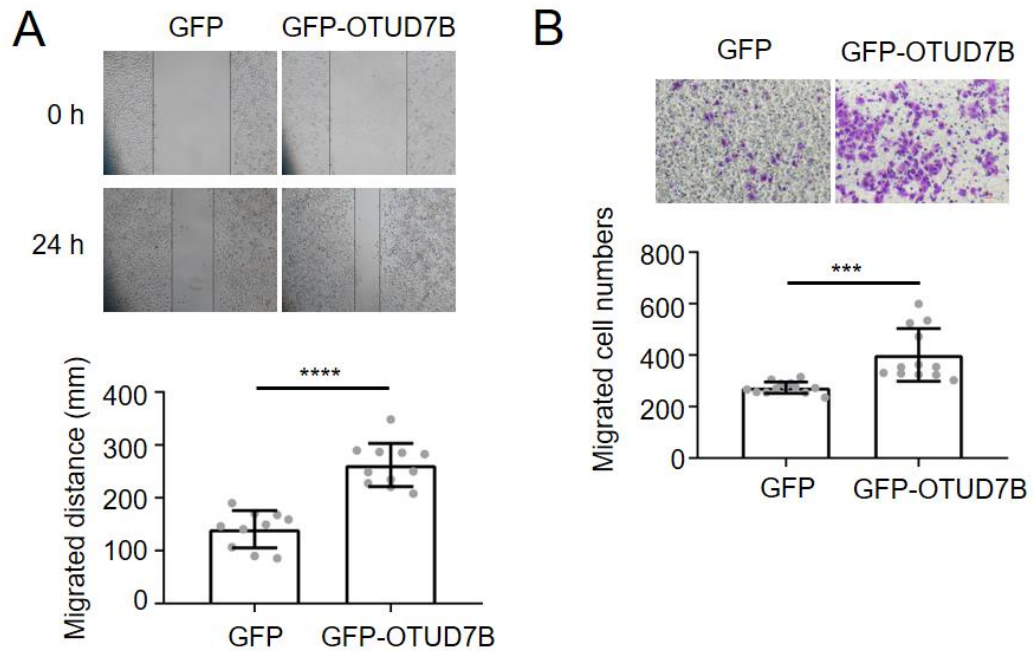

**Supplementary Figure S6. OTUD7B enhances migration and invasion in A549 cells.** A549 lung cancer cells were transduced with GFP or GFP-OTUD7B. Wound healing assay (**A**) and transwell invasion assay using Boyden chamber (**B**) in A549 cells were performed and photographed under a light microscope (magnification,  $\times 100$ ). Representative images are shown (*upper panels*). Data are shown as mean  $\pm$  s.d. \*\*\*,  $P < 0.001$ , \*\*\*\*,  $P < 0.0001$ .

**Tumor Non-small cell lung carcinoma - Plamadeala - 410 - MAS5.0 - u133p2**  
410 samples, transform\_2log

| GeneID                | Hugo   | Description                          |
|-----------------------|--------|--------------------------------------|
| <a href="#">56957</a> | OTUD7B | OTU deubiquitinase 7B                |
| <a href="#">7422</a>  | VEGFA  | vascular endothelial growth factor A |

| R2 gene categories |                                                                        |
|--------------------|------------------------------------------------------------------------|
| OTUD7B             | <i>sign transd</i>                                                     |
| VEGFA              | <i>apoptosis, development, diff, drugtarget, membrane, sign transd</i> |

**Significance of correlation:**  
**r-value=0.239 p-value= 1.00e-06 T-value=4.967 degrees of freedom=408**

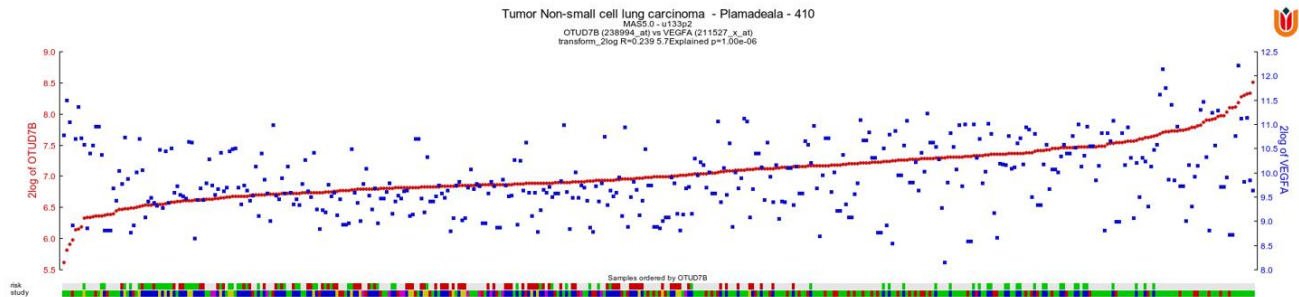

**Supplementary Figure S7. Correlation analysis between OTUD7B and VEGF using R2: Genomics Analysis and Visualization Platform system.** Tumor Non-small cell lung carcinoma-Plamadeala-410-MAS5.0-u133p2 dataset included 410 NSCLC patients was selected to observe the expression correlation between OTUD7B and VEGF.



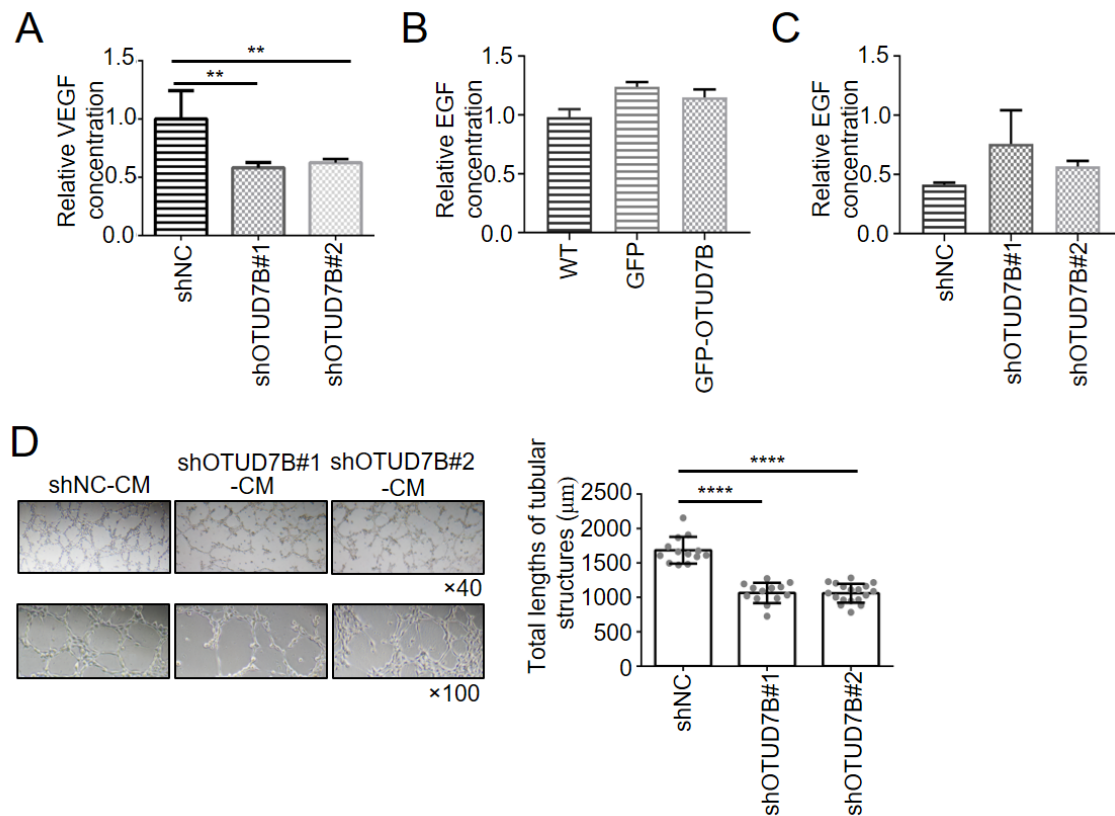

**Supplementary Figure S8. Knockdown of OTUD7B decreases VEGF production in NCI-H358 cells.** (A) NCI-H358 cells were transduced with shNT, shOTUD7B#1 or shOTUD7B#2, media was removed, washed in RPMI-1640 with 0.5% FBS and incubated for an additional 24 h in RPMI-1640 with 0.5% FBS. Conditioned media were collected and VEGF expression was analyzed by ELISA assay. (B) NCI-H358 cells were transduced with GFP or GFP-OTUD7B expression vector, conditioned media were collected and EGF expression was analyzed by ELISA assay. (C) Conditioned media from NCI-H358 cells were collected and EGF expression were analyzed by ELISA assay. (D) EA.hy926 endothelial cells were pretreated with conditioned media collected from NCI-H358 cells (shNT-CM, shOTUD7B#1-CM or shOTUD7B#2-CM) for 24 h. Subsequently, pretreated EA.hy926 cells were seeded on Matrigel for 8 h to observe tube formation. Representative photographs are shown (left). Tube lengths were quantitated using IMAGE-PRO PLUS software (n = 5 per group). Data are shown as mean  $\pm$  s.d. \*\*\*,  $P < 0.001$ , \*\*\*\*,  $P < 0.0001$ .



**A**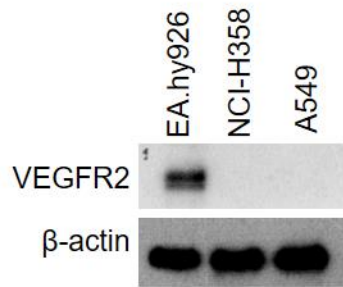**B**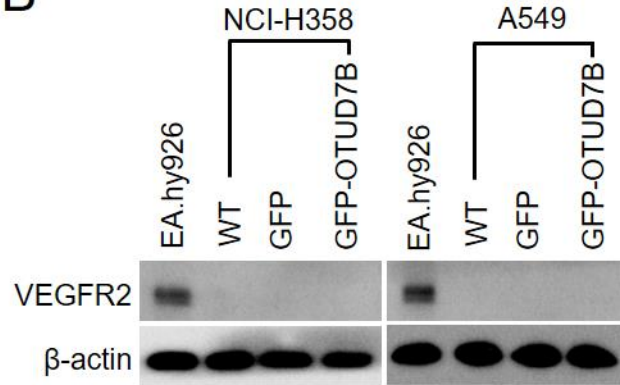

**Supplementary Figure S9. VEGFR2 expression in EA.hy926 endothelial cells and NSCLC cell lines.** (A, B) EA.hy926 endothelial cells, NCI-H358 and A549 NSCLC cells transduced with GFP or GFP-OTUD7B or wild type (WT) cells were lysed and total cell lysates were subjected to immunoblotting assay using indicated antibodies.

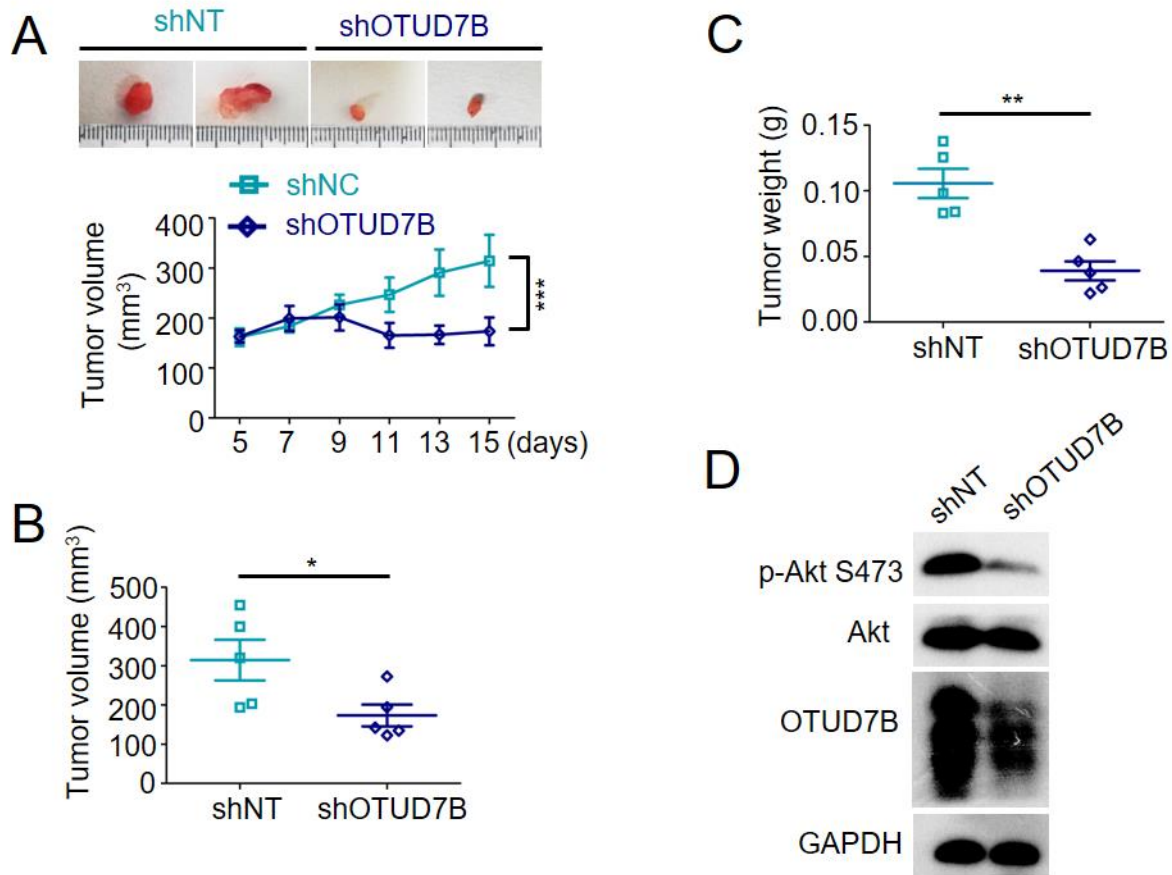

**Supplementary Figure S10. Knockdown of OTUD7B reduces *in vivo* tumorigenicity of NSCLC.**

(A) Nude mice were injected s.c. with shNT- or shOTUD7B-NCI-H358 cells at  $5 \times 10^6$  cells per site. Tumor volume was monitored every 2 days after subcutaneous injection and tumor growth curve is shown (lower). Tumor volume was calculated by the formula:  $V = 1/2 \times a \text{ (length)} \times b^2 \text{ (width)}$ . Tumors were harvested from the mice 15 days after subcutaneous injection and photographed (upper). (n=5 per group). (B and C) The volume (B) and the weight (C) of the harvested tumors was measured. (D) Total lysates of tumor tissues were subjected to immunoblotting using anti-p-Akt and anti-Akt antibodies. Data are shown as mean  $\pm$  s.e.m. \*,  $P < 0.05$ , \*\*,  $P < 0.01$ , \*\*\*,  $P < 0.001$ .
